# Supplementary material for: Development and Validation of a Liquid Chromatography High-Resolution Mass Spectrometry Method for the Simultaneous Determination of Mycotoxins and Phytoestrogens in Plant-Based Fish Feed and Exposed Fish
Source: PubMed Central journal article supplement (PMC6520669; doi:10.3390/toxins11040222), 2019-04-13
Supplement: toxins-11-00222-s001.pdf [file toxins-11-00222-s001.pdf]

# Supplementary Materials: Development and Validation of a Liquid Chromatography High-Resolution Mass Spectrometry Method for the Simultaneous Determination of Mycotoxins and Phytoestrogens in Plant-Based Fish Feed and Exposed Fish

Amritha Johny \*, Christiane Kruse Fæste, André S. Bøgevik, Gerd Marit Berge, Jorge M.O. Fernandes and Lada Ivanova

Table S1. Molecular characteristics of target analytes.

| Compound   | Structure                                                                           | Formula                                                       | MW (g/mol) | LogP |
|------------|-------------------------------------------------------------------------------------|---------------------------------------------------------------|------------|------|
| DON        |    | C <sub>15</sub> H <sub>20</sub> O <sub>6</sub>                | 296.319    | -0.7 |
| 3-ADON     |    | C <sub>17</sub> H <sub>22</sub> O <sub>7</sub>                | 338.356    | -0.1 |
| 15-ADON    |   | C <sub>17</sub> H <sub>22</sub> O <sub>7</sub>                | 338.356    | -0.7 |
| DON-3G     |  | C <sub>21</sub> H <sub>30</sub> O <sub>11</sub>               | 458.46     | -2.3 |
| NIV        |  | C <sub>15</sub> H <sub>20</sub> O <sub>7</sub>                | 312.318    | -1.7 |
| T-2        |  | C <sub>24</sub> H <sub>34</sub> O <sub>9</sub>                | 466.527    | 0.9  |
| HT-2       |  | C <sub>22</sub> H <sub>32</sub> O <sub>8</sub>                | 424.490    | 0.4  |
| OTA        |  | C <sub>20</sub> H <sub>18</sub> ClNO <sub>6</sub>             | 403.815    | 4.7  |
| ZEN        |  | C <sub>18</sub> H <sub>22</sub> O <sub>5</sub>                | 318.369    | 3.6  |
| Ergonovine |  | C <sub>19</sub> H <sub>23</sub> N <sub>3</sub> O <sub>2</sub> | 325.412    | 1.8  |
| Ergosine   |  | C <sub>30</sub> H <sub>37</sub> N <sub>5</sub> O <sub>5</sub> | 547.656    | 1.8  |

|                        |                                                                                     |                      |         |     |
|------------------------|-------------------------------------------------------------------------------------|----------------------|---------|-----|
| Ergotamine             | 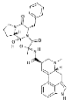   | $C_{33}H_{35}N_5O_5$ | 581.673 | 2.0 |
| Ergocornine            |    | $C_{31}H_{39}N_5O_5$ | 561.683 | 2.4 |
| $\alpha$ -Ergocryptine |    | $C_{32}H_{41}N_5O_5$ | 575.71  | 2.7 |
| Ergoscristine          |    | $C_{35}H_{39}N_5O_5$ | 609.727 | 3.0 |
| ENN A                  |    | $C_{36}H_{63}N_3O_9$ | 681.912 | 7.6 |
| ENN A1                 |    | $C_{35}H_{61}N_3O_9$ | 667.885 | 7.3 |
| ENN B                  |    | $C_{33}H_{57}N_3O_9$ | 639.831 | 6.5 |
| ENN B1                 |   | $C_{34}H_{59}N_3O_9$ | 653.858 | 6.9 |
| Daidzein               |  | $C_{15}H_{10}O_4$    | 254.241 | 2.5 |
| Daidzin                |  | $C_{21}H_{20}O_9$    | 416.382 | 0.7 |
| Genistein              |  | $C_{15}H_{10}O_5$    | 270.240 | 2.7 |
| Genistin               |  | $C_{21}H_{20}O_{10}$ | 432.381 | 0.9 |
| Glycitein              |  | $C_{16}H_{12}O_5$    | 284.267 | 2.4 |
| Glycitin               |  | $C_{22}H_{22}O_{10}$ | 446.408 | 0.6 |
